# Supplementary material for: Interactive influence of extracellular polymeric substances (EPS) and electrolytes on the colloidal stability of silver nanoparticles
Source: Royal Society of Chemistry journal article supplement (doi:10.1039/c9en00861f), 2019-11-14
Supplement: c9en00861f1.pdf [file c9en00861f1.pdf]

## Supporting Information

### **Interactive influence of extracellular polymeric substances (EPS) and electrolytes on the colloidal stability of silver nanoparticles**

Ishara Fernando<sup>1,2</sup>, Dan Lu<sup>2,3</sup>, Yan Zhou<sup>2,3\*</sup>

<sup>1</sup>Interdisciplinary Graduate School, Nanyang Technological University, Singapore 639798.

<sup>2</sup>Nanyang Environment & Water Research Institute, Advanced Environmental Biotechnology Centre, Nanyang Technological University, 1 Cleantech Loop, CleanTech One, Singapore 637141.

<sup>3</sup>School of Civil & Environmental Engineering, College of Engineering, Nanyang Technological University, Singapore 639798.

\*Corresponding author at: Tel.: +65 6790 6103; E-mail address: [zhouyan@ntu.edu.sg](mailto:zhouyan@ntu.edu.sg)

## Experimental Methods

### 1. FTIR

FTIR spectra were obtained on a spectrometer (Perkin Elmer, Frontier Series) equipped with Mercury Cadmium Telluride (MCT)-(MIR) liquid nitrogen-cooled detector and Spectrum processing software. FTIR spectrum was acquired in the 4000-600  $\text{cm}^{-1}$  region with a resolution of 16  $\text{cm}^{-1}$ .

### 2. Adsorption Experiments

AgNP suspensions and EPS solutions were mixed with  $\text{NaNO}_3$  and  $\text{Ca}(\text{NO}_3)_2$  solutions at different concentrations. The mixture was gently shaken at 25 °C for 2 h and centrifuged at 20,000 g for 30 min. The total organic C of SB-EPS, LB-EPS and TB-EPS in the supernatant were determined using a TOC analyzer (multi N/C 3100, Analytik Jena, Germany). The amount of EPS-C adsorbed was calculated by the difference between the amount of EPS added and that remaining in the supernatant.

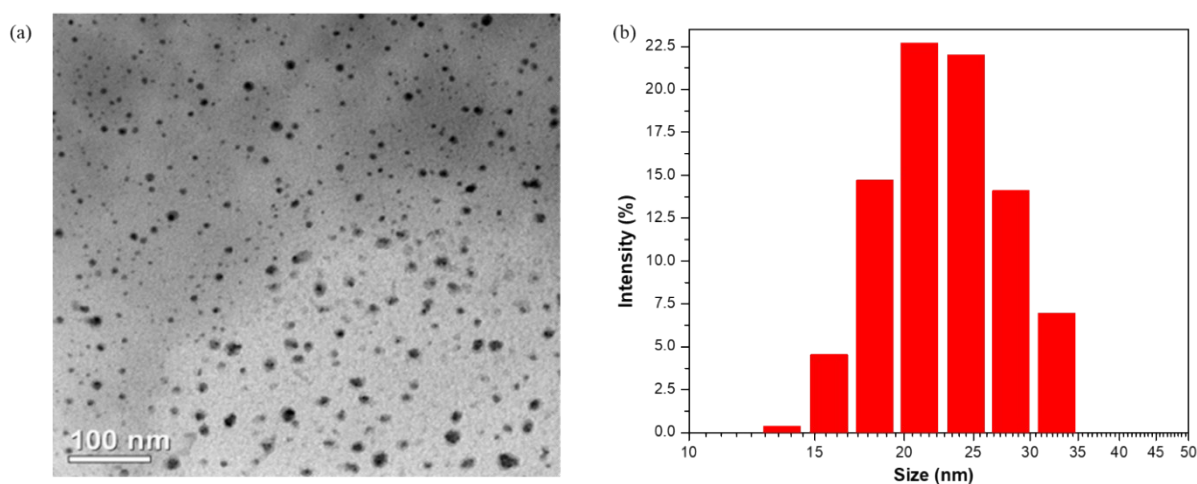

**Fig. S1.** Characterization of the synthesized AgNPs (a) Morphology of AgNPs in parent solution observed by TEM; (b) Particle Size distribution of the AgNPs in parent solution.

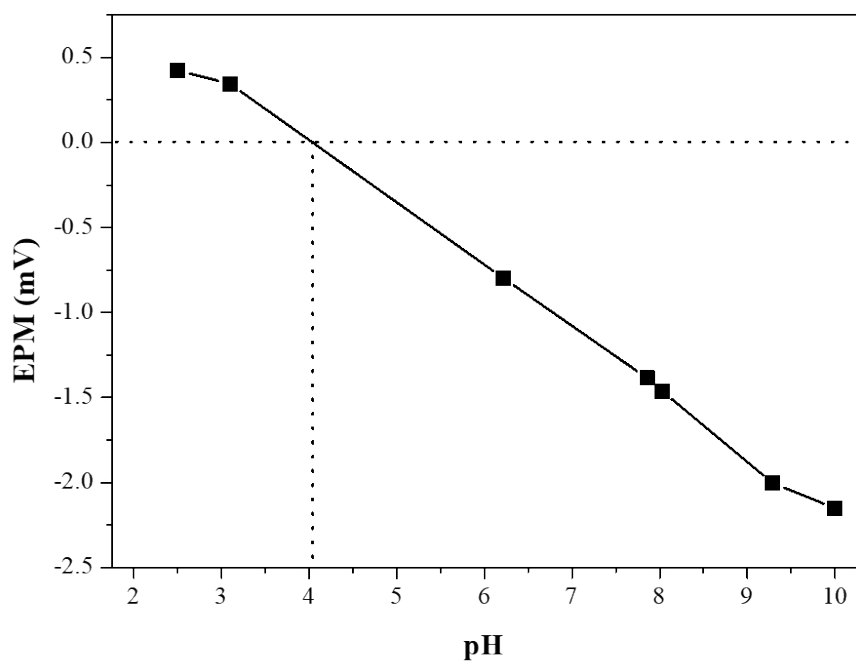

**Fig. S2.** EPM of AgNPs as a function of pH

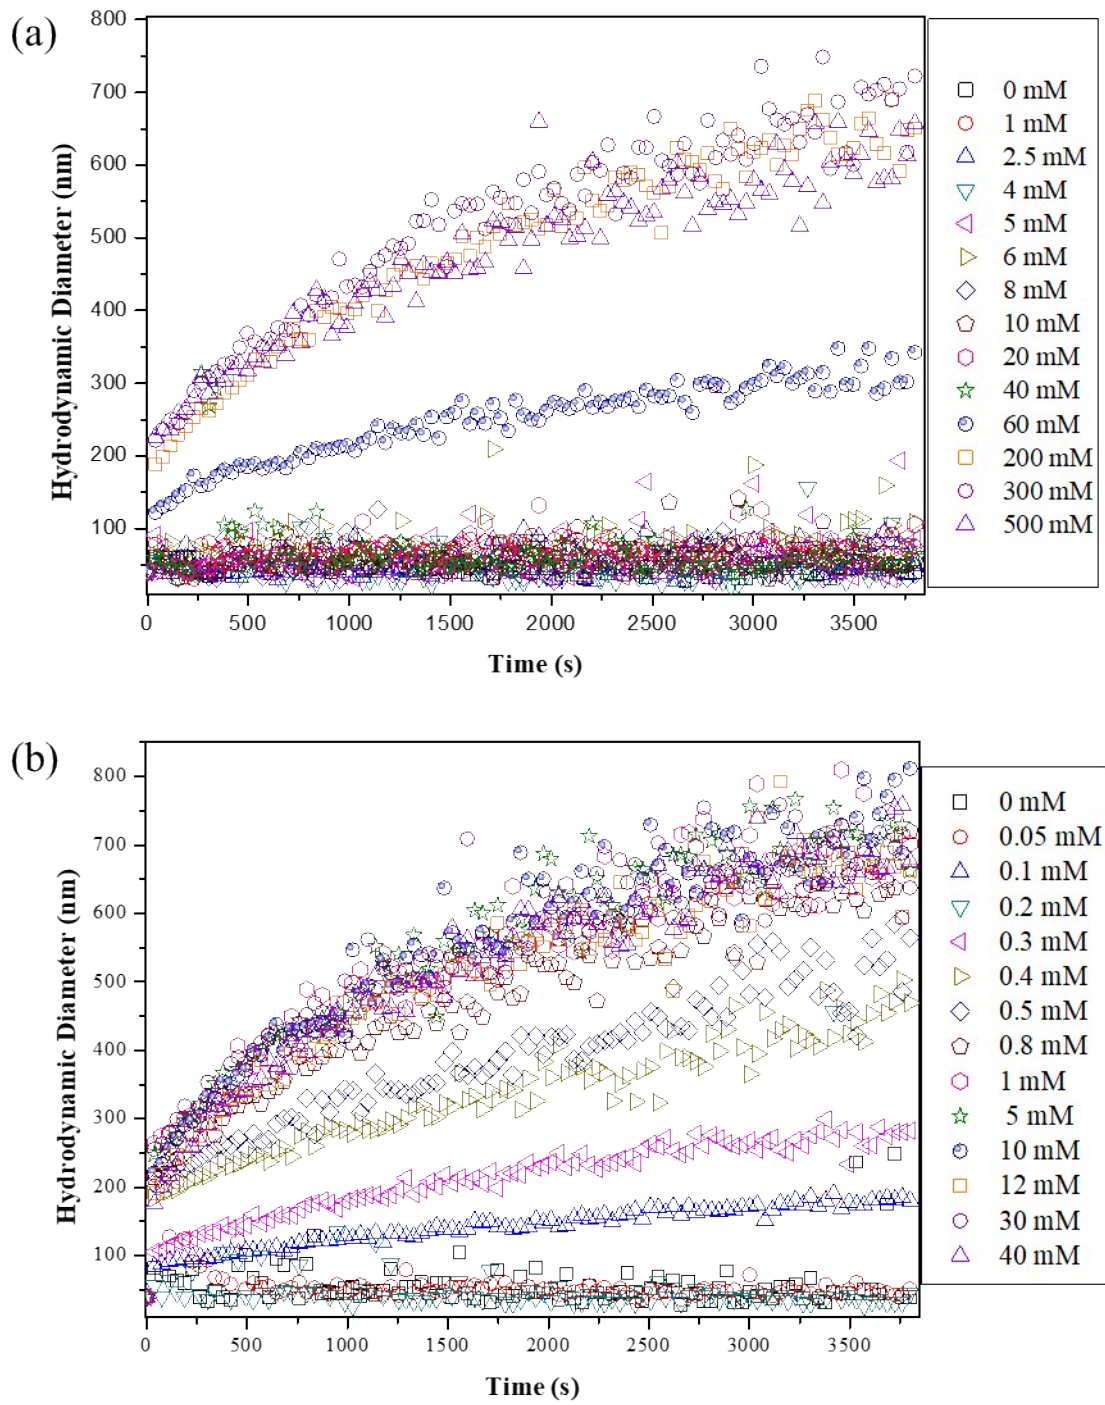

**Fig. S3.** Aggregation profiles of AgNPs in (a) NaNO<sub>3</sub> and (b) Ca(NO<sub>3</sub>)<sub>2</sub> solutions.

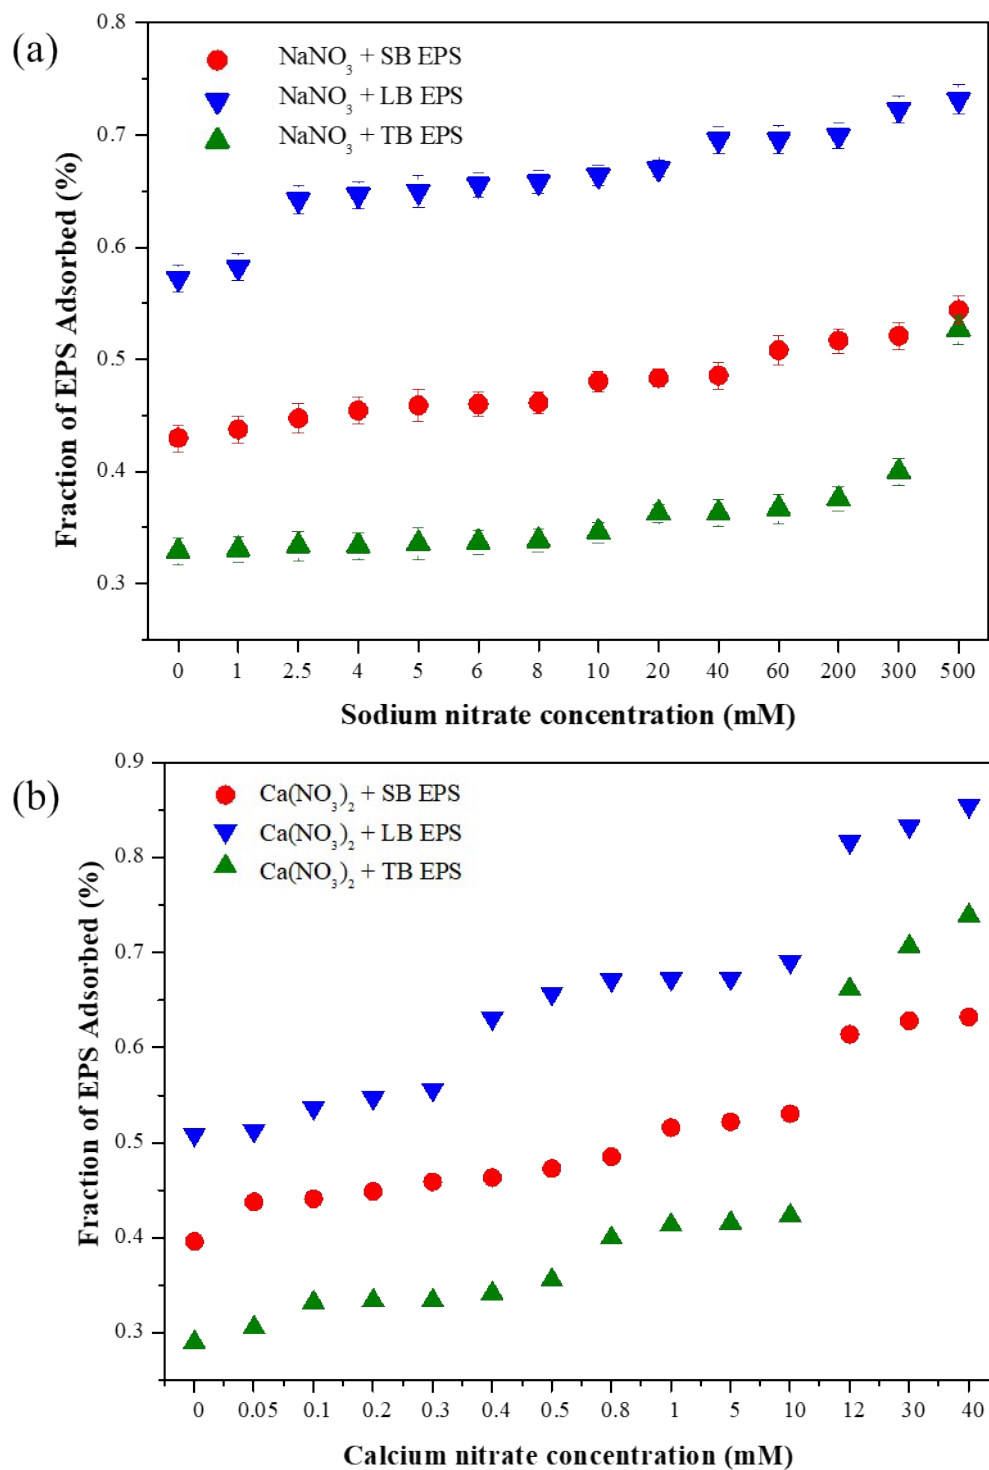

**Fig. S4.** The mass fraction of EPS-C adsorbed by AgNPs as a function of (a) NaNO<sub>3</sub> and (b) Ca(NO<sub>3</sub>)<sub>2</sub> concentration.

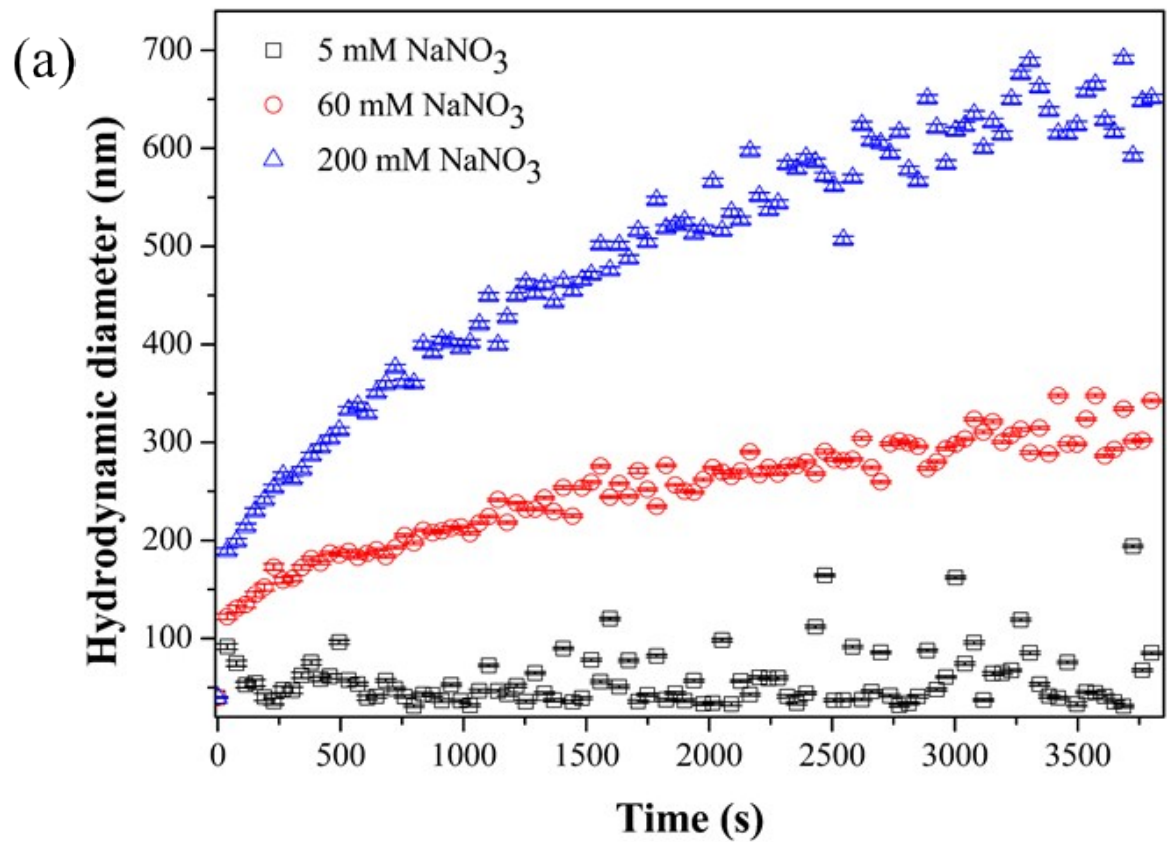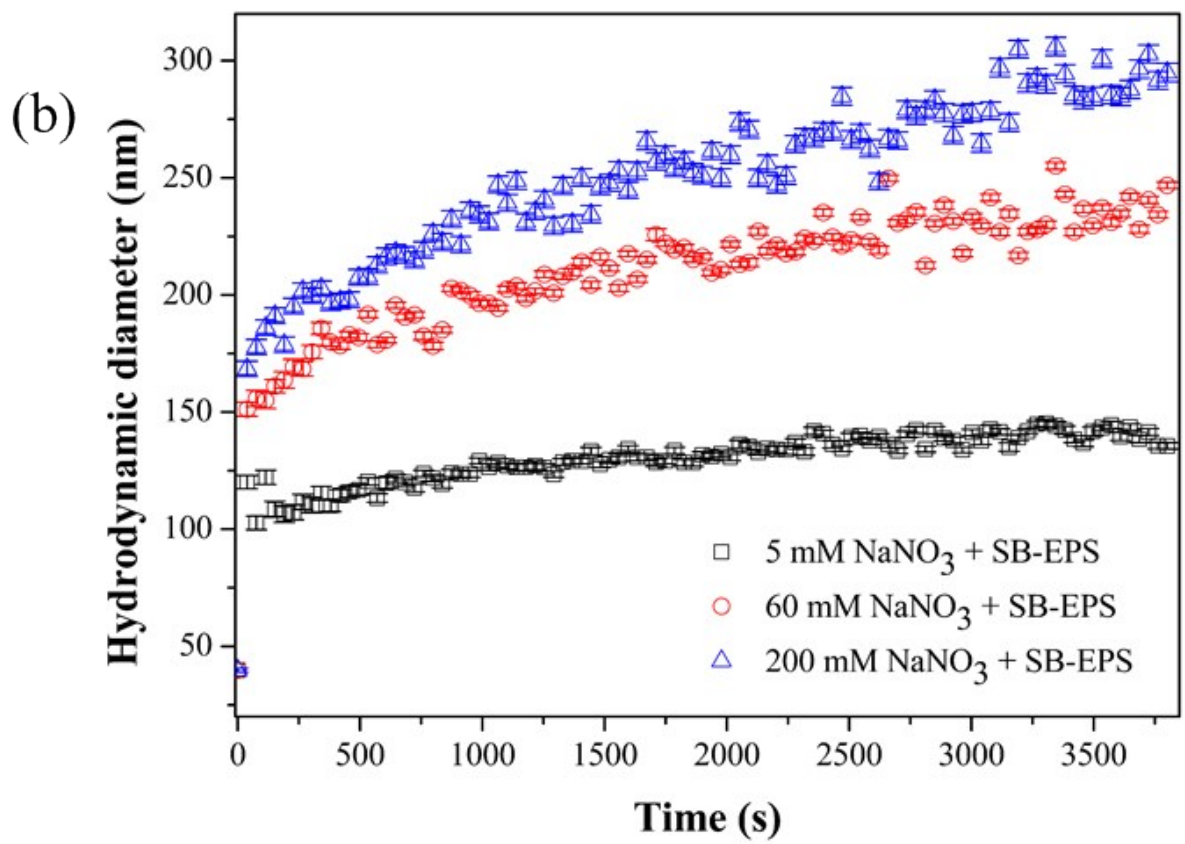

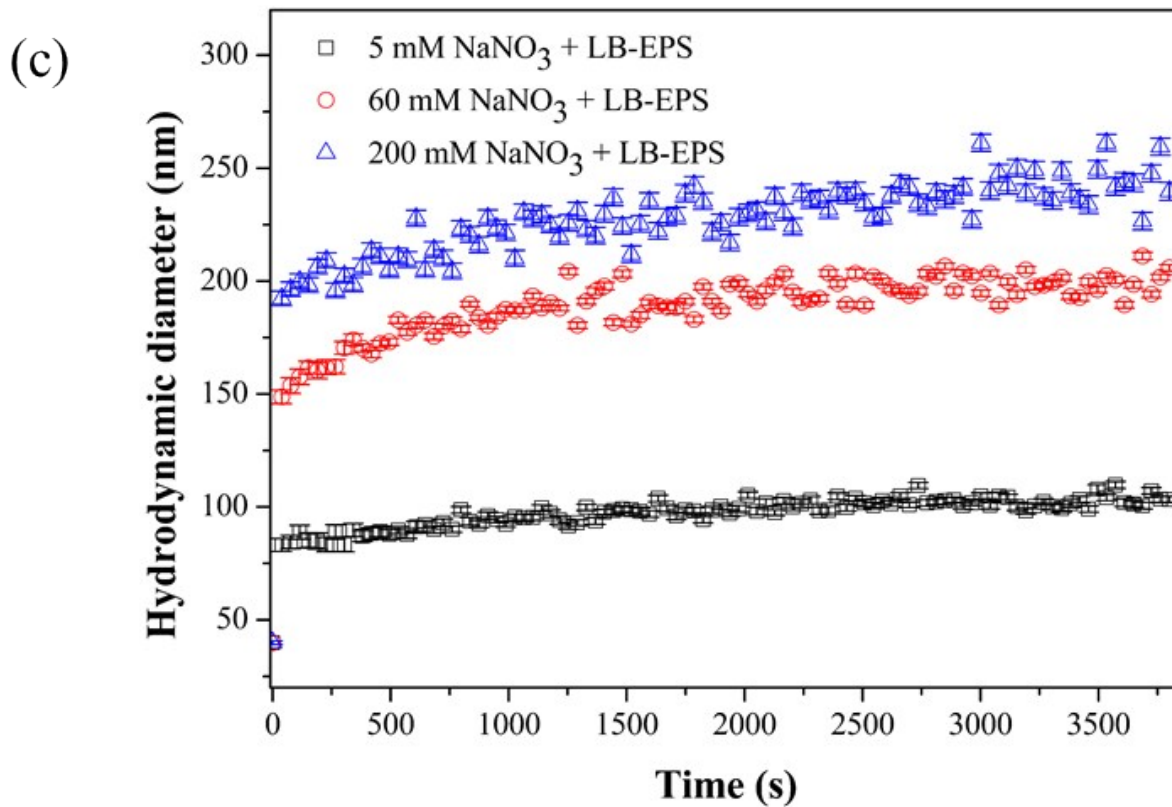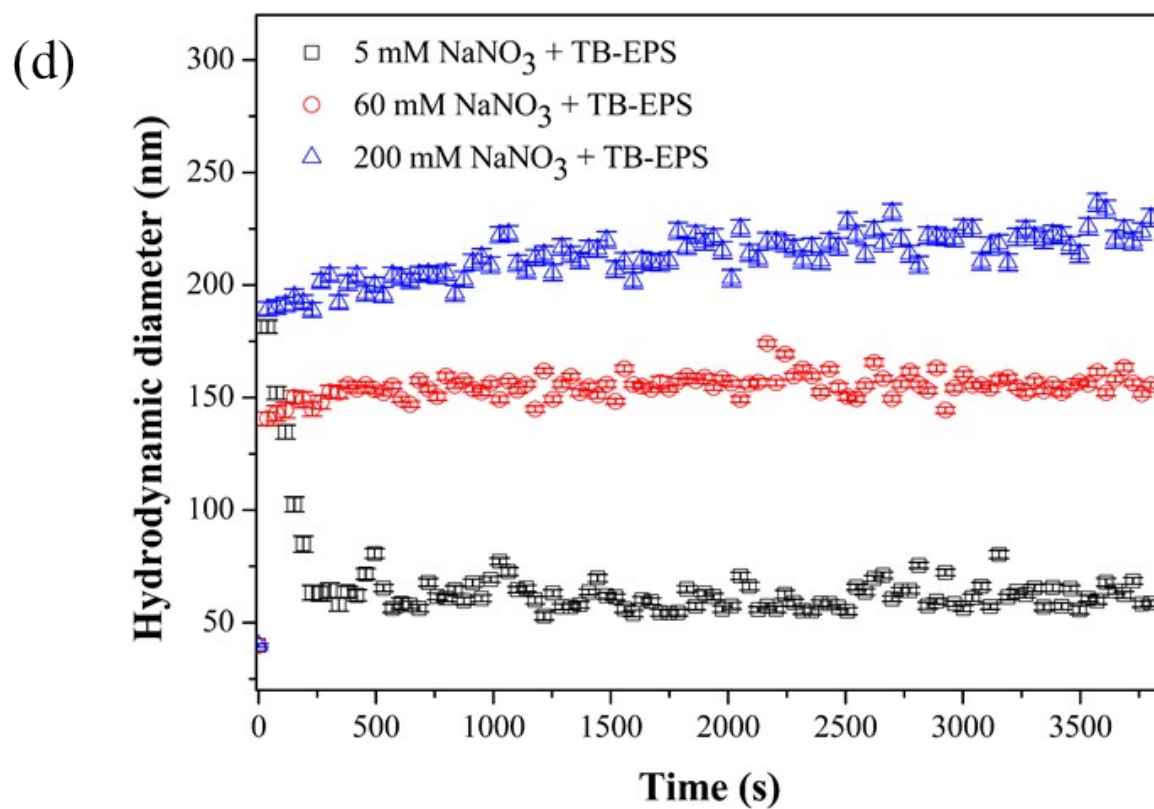

**Fig. S5.** Aggregation profiles of AgNPs in various NaNO<sub>3</sub> solutions in the (a) absence and presence of (b) SB-EPS, (c) LB-EPS and (d) TB-EPS.



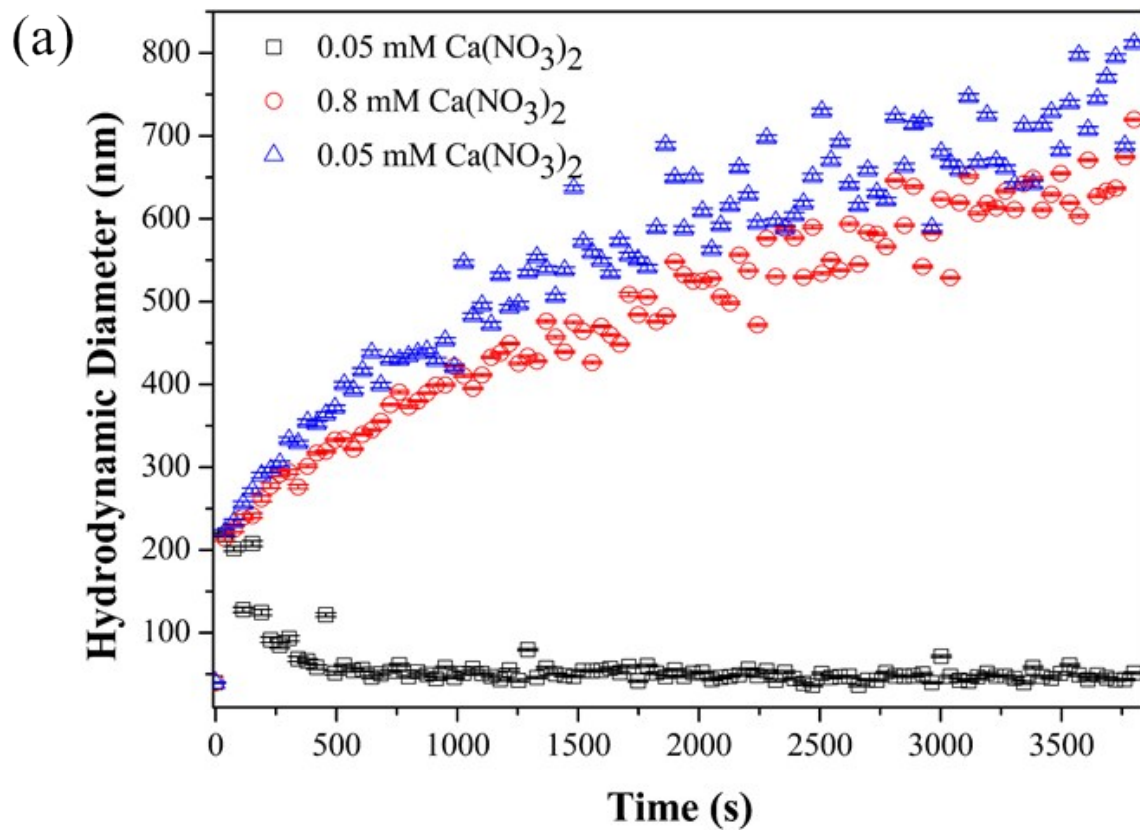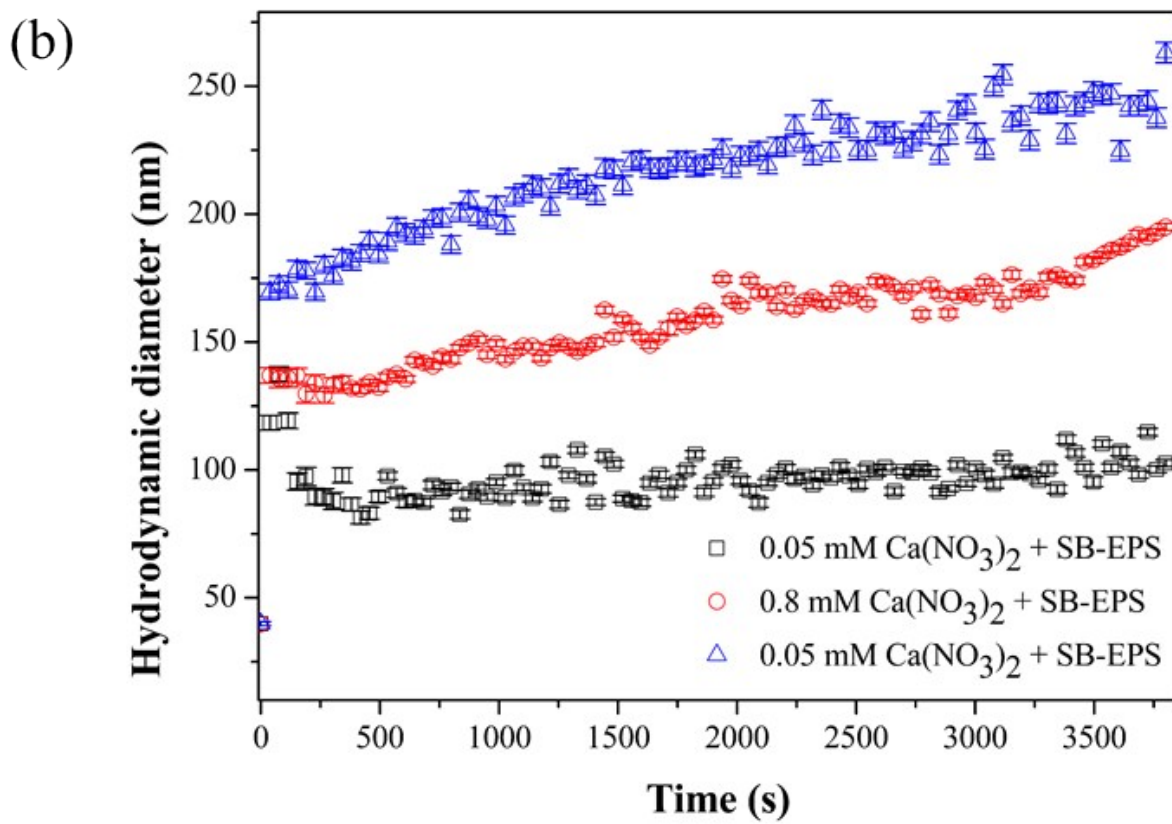



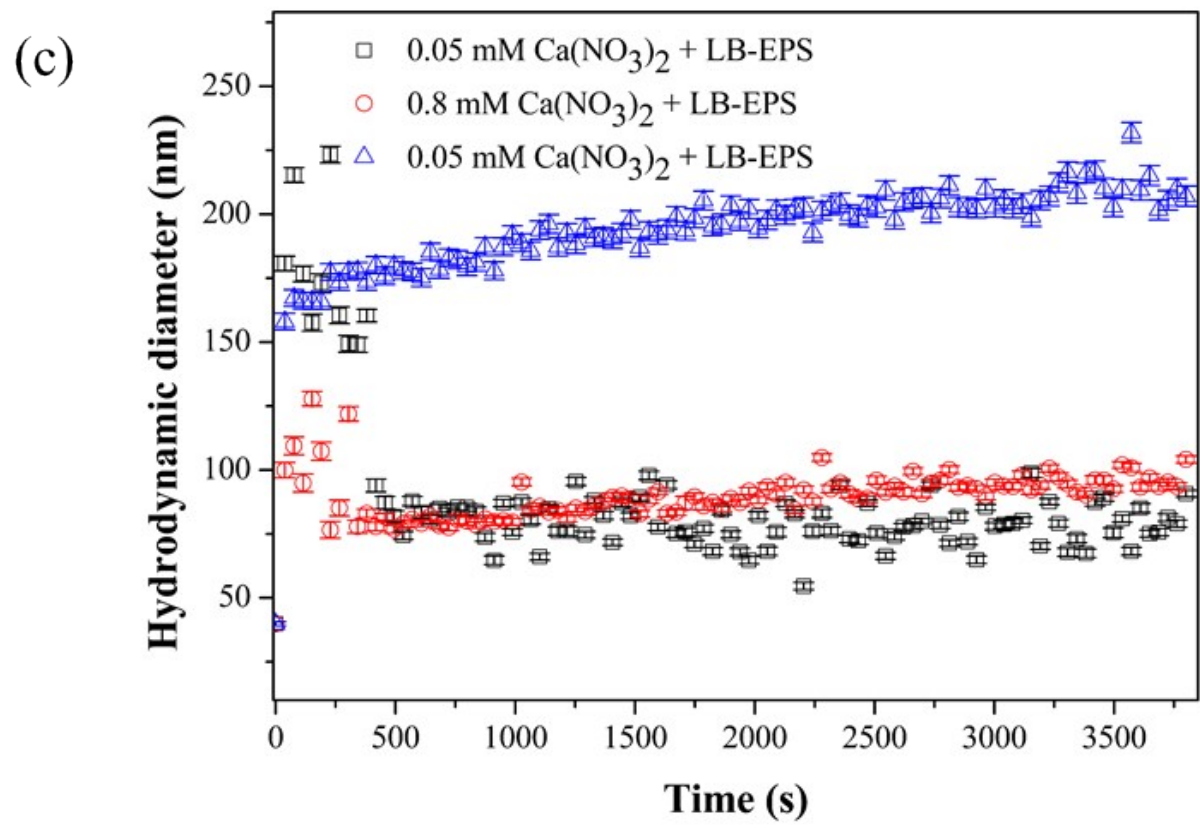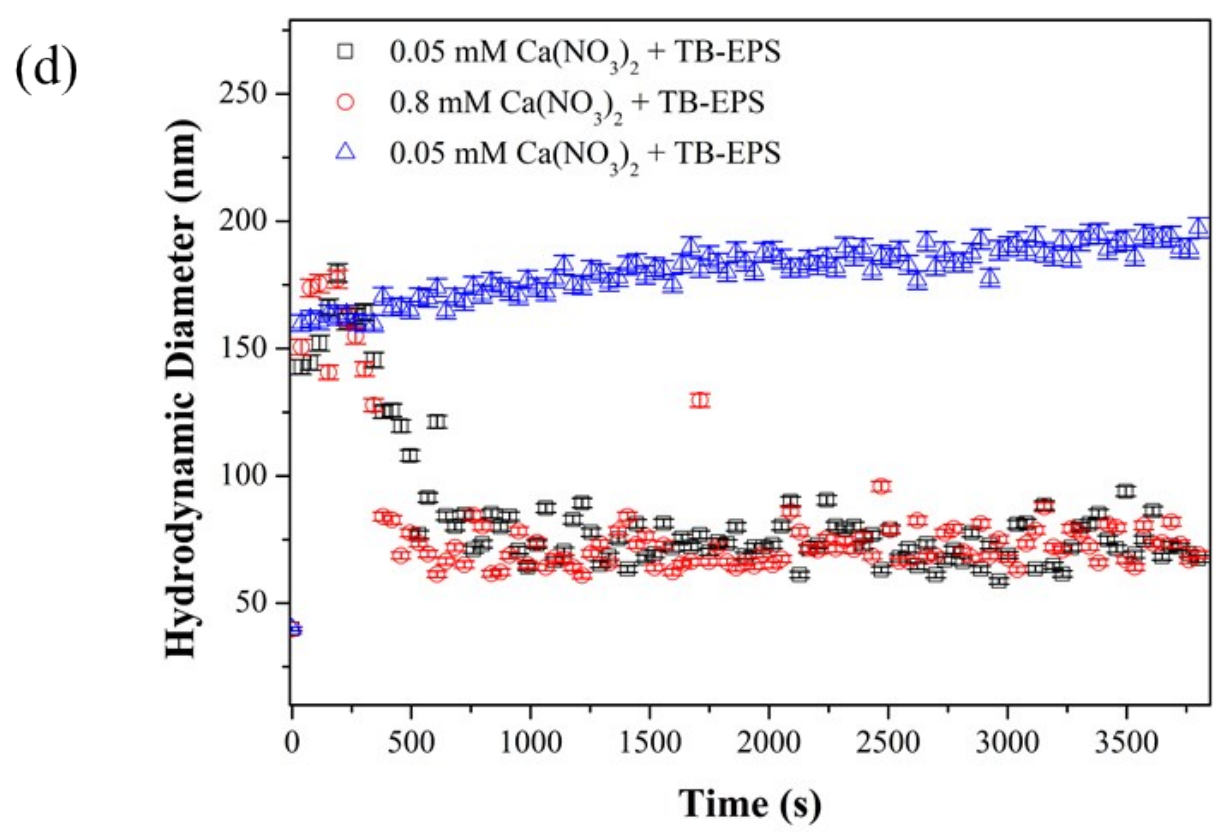

**Fig. S6.** Aggregation profiles of AgNPs in various  $\text{Ca}(\text{NO}_3)_2$  solutions in the (a) absence and presence of (b) SB-EPS, (c) LB-EPS and (d) TB-EPS

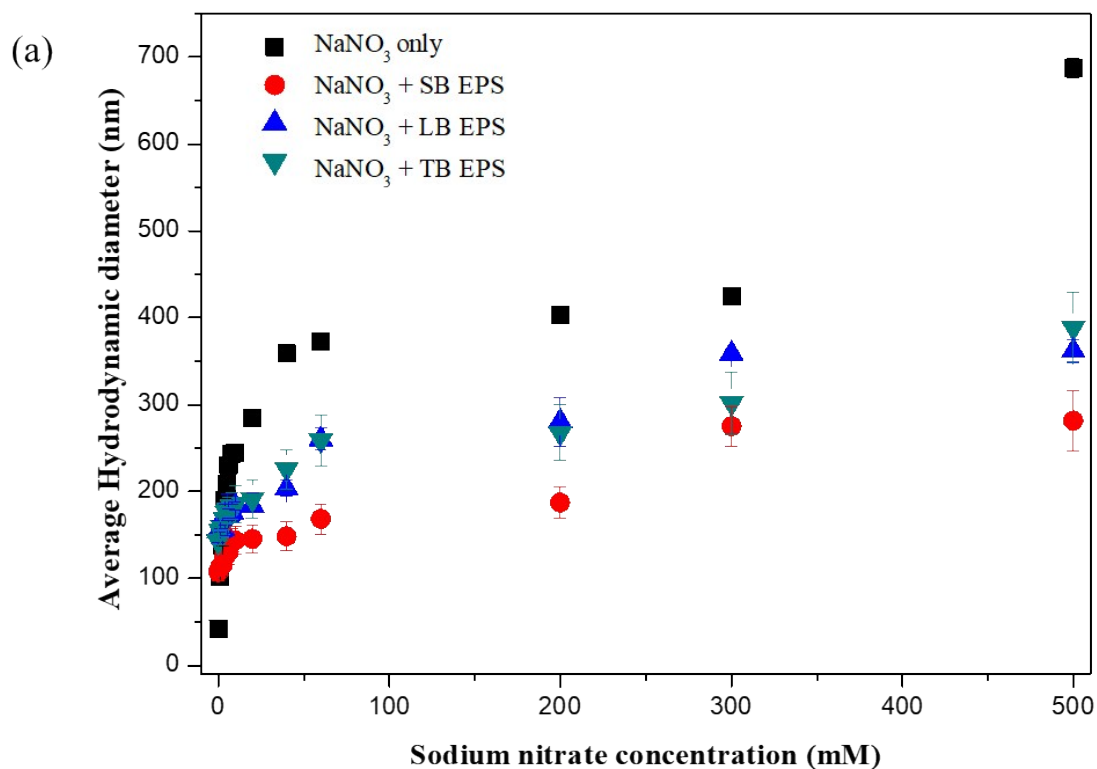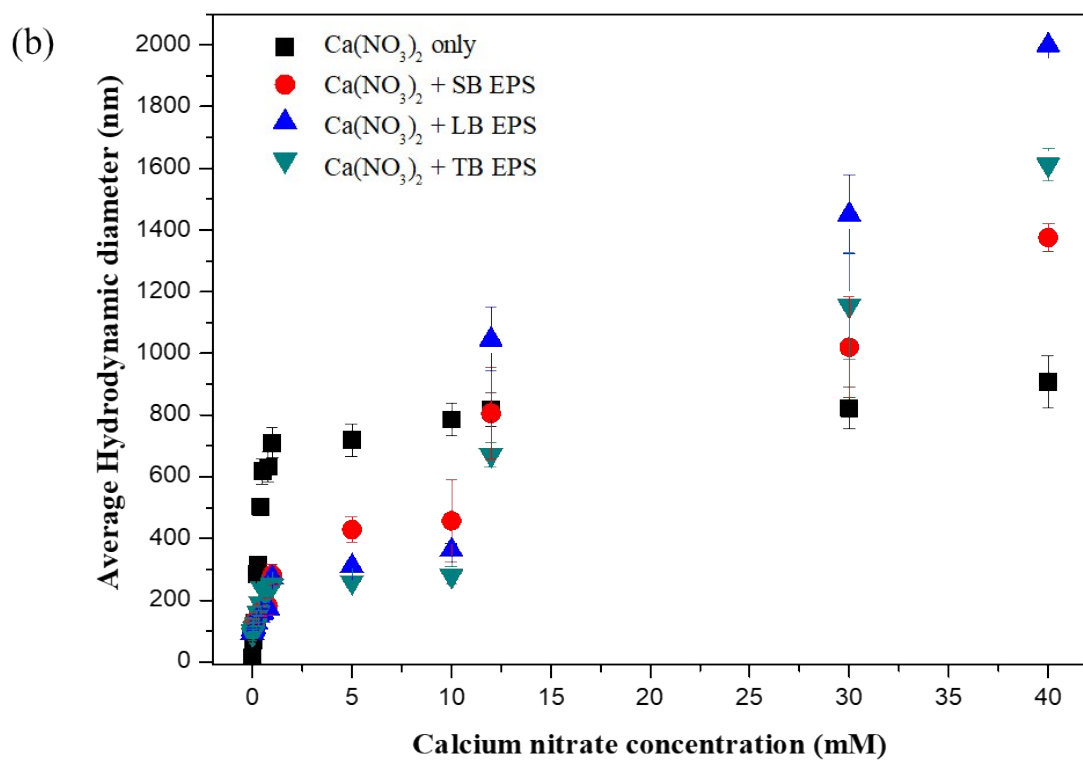

**Fig. S7.** Z-average diameter of AgNPs with and without SB-EPS, LB-EPS and TB-EPS as a function of (a) NaNO<sub>3</sub> and (b) Ca(NO<sub>3</sub>)<sub>2</sub> concentration.
